# Supplementary material for: Improving the precipitation accumulation analysis using radar-, gauge- and lightning measurements
Source: Copernicus journal article supplement (doi:10.5194/hess-2016-113), 2016-03-17
Supplement: Supplementary file [file hess-2016-113-AC3-supplement.pdf]

# Improving the precipitation accumulation analysis using lightning measurements and different integration periods

E. Gregow<sup>1</sup>, A. Pessi<sup>2</sup>, A. Mäkelä<sup>1</sup> and E. Saltikoff<sup>1</sup>

5 <sup>1</sup>Finnish Meteorological Institute, P.O. Box 503, FIN-00101 Helsinki, Finland

<sup>2</sup>Vaisala, 3 Lan Dr., Westford, MA 01886, USA

*Correspondence to:* E. Gregow (erik.gregow@fmi.fi)

**Abstract.** The focus of this article is to improve the precipitation accumulation analysis, with  
10 special focus on the intense precipitation events. Two main objectives are addressed: (i) the  
assimilation of lightning observations together with radar and gauge measurements and (ii)  
the analysis of the impact of different integration periods in the radar-gauge correction  
method. The article is a continuation of previous work in the same research-field, by Gregow  
et al. (2013).

15 A new Lightning Data Assimilation (LDA) method has been implemented and validated  
within the Finnish Meteorological Institute (FMI) - Local Analysis and Prediction System  
(LAPS). Lightning data does improve the analysis when no radar is available, and even with  
radar, lightnings have a neutral to positive impact on the results.

The radar-gauge assimilation method is highly dependent on statistical relationships between  
20 radar and gauges, when performing the correction to precipitation accumulation field. Here  
we investigate the usage of different time integration intervals: 1, 6, 12, 24 hours and 7 days.  
This will change the amount of data used and affect the statistical calculation of the radar-  
gauge relations. Verification shows that the real-time analysis using the 1 hour integration  
time length gives the best result.

## 1 Introduction

30 Accurate estimates of accumulated precipitation are needed for several applications, such as flood protection, hydropower, road- and fire-weather models. In Finland, one of the economically most relevant users of precipitation is hydropower industry. Between 10 and 20% of Finnish annual electric power production comes from hydropower, depending on the amount of precipitation and water levels in dams and water reservoirs. In order to maintain  
35 correct calculation of the energy supplied to customers and to avoid (or at least minimize) the environmental risks and economical losses during extreme precipitation and flooding events, a profound analysis of the expected water amounts in dams and reservoirs from catchment-areas is needed. The current hydropower strategy of Finland is to increase capacity by improving the efficiency of existing plants through technical adjustments. The maintenance  
40 and planning of proper dam structures need the most up-to-date information about the rain rates to be able to adjust the regulation functions of the dams, both for the current and the changing climatic conditions (IPCC-AR5, 2013).

Often, the accumulated precipitation values are based on pure radar analysis, unless there exists a surface gauge observation in the immediate surroundings. Radar echoes are related to  
45 rainfall rate and thereafter transformed into accumulation values. However, such conversions are based on general empirical relations, which are not suitable for all meteorological cases (e.g. depending on precipitation type; Koistinen and Michelson, 2002). Radar reflectivity can in some cases suffer from poor quality, resulting from electronic mis-calibration, beam blocking, clutter, attenuation and overhanging precipitation (Saltikoff et al., 2010). In some  
50 cases the radar can even be missing, due to upgrading or technical problems. Thunderstorms add probability of many of these problems in form of interruptions in electricity and telecommunications, and attenuation due to intervening heavy precipitation. In general, combining radar and rain gauge data is very difficult in the vicinity of heavy, local rain cells (Einfalt et al., 2005).

55 The research of combining radar and surface observations, to perform corrections to precipitation accumulation, is well explored. Many have made developments in this field and much literature is available, for example Sideris et al. (2014), Schiemann et al. (2011) and Goudenhoofdt and Delobbe (2009). Recently, Jewell and Gaussiat (2015) compared performances of different merging schemas, and noted a large difference between convective  
60 and stratiform situations. In their study, the non-parametric kriging with external drift (KEDn)

outperformed other methods in accumulation period of 60 minutes. Wang et al (2015) developed a sophisticated method for urban hydrology, which preserves the non-normal characteristics of the precipitation field. They also noticed that common methods have a tendency to smooth out the important but spatially limited extremes of precipitation.

65 Comparing radars and gauges, an additional challenge arises from the different sampling sizes of the instruments. Radar measurement volume can be several kilometers wide and thick (one degree beam is approximately 5 kilometres wide at 250 kilometres), while the measurement area of a gauge is 400 cm<sup>2</sup> (weighing gauges) or 100 cm<sup>3</sup> (optical instruments). Part of the disparateness of radar and gauge measurements is due to variability of the raindrop size  
70 distribution within area of a single radar pixel. Jaffrain and Berne (2012) have observed variability up to 15% of the rainrate in a 1x1 km pixel, with timesteps of 1 minute. Gires et al (2014) have shown that the scale difference has an effect in verification measures (such as normalized bias, e.g. RMSE) but it decreases with growing accumulation time (e.g. from 5 to 60 minutes). In our study, the 60 minutes accumulation period is smoothing some of the  
75 differences.

Lightning is associated with convective precipitation, but in areas where a large portion of precipitation is stratiform, lightning data alone is not adequate for precipitation estimation. However, lightning has been used to complement and improve other datasets. Morales and Agnastou (2003) combined lightning with satellite-based measurements to distinguish  
80 between convective and stratiform precipitation area and achieved a remarkable 31% bias reduction, compared to satellite-only techniques. Lightning has also been assimilated to numerical weather prediction models to improve the initialization process of the model. This can be done by blending them with other remote sensing data to create heating profiles (e.g. estimating the latent heat release when precipitation is condensed). Papadopoulos et al. (2005)  
85 used lightning data to identify convective areas and then modified the model humidity profiles, allowing the model to produce convection and release latent heat using its own convective parameterization scheme. They combined lightning with 6-hourly gauge data, within a mesoscale model in the Mediterranean area, and showed improvement in forecasts up to 12 hours lead time.

90 Our situation is different from the above mentioned experiments because lightning activity is usually low in Finland, compared to warmer climates (Mäkelä et al., 2011). Also, our analysis area already has a good radar coverage and relatively evenly distributed network of 1 hour

gauge measurements. However, if we want to enlarge the analysis area, we will soon go to either sea areas or neighbouring countries where availability of radar data and frequent gauge  
95 measurements is low. Our principal goal is to have as good analysis as possible, which is different from having a best analysis to start a model.

Gregow et al. (2013) has proven that there is a benefit of assimilating various sources of data to estimate the precipitation accumulation (e.g. combining radar and gauge data via the Regression and Barnes method). It was also shown, that the largest uncertainties took place  
100 during heavy rainfall (i.e. convective weather situations), situations when lightning is likely to take place. To improve the precipitation analysis new methods are adopted to enable estimation of accumulated precipitation in a spatially precise and timely manner (i.e. near real-time). This is done by using weather radar, lightning observations and rain gauge information in novel ways. This leads to better possibilities in estimating extreme rainfall  
105 events (i.e.  $> 5$  mm/h) and the accumulated precipitation, for the benefit of hydropower management and other related application areas. The work reported here has been performed using the operational Local Analysis and Prediction System (LAPS), which is used in the wether service of Finnish Meteorological Institute (FMI). Testing new approaches in an operational system has its limitations in e.g. excluding independent reference stations. Also  
110 the possibilities to rerun cases with different settings have been limited. The benefit of the approach is that we can be sure that we only use data which is operationally available.

In this article the observational datasets are described in chapter 2. New methods on how to calculate the precipitation accumulation is handled in chapter 3, and the results and discussion are shown in chapters 4 and 5, respectively.

115

## **2 Observations and instrumentation**

Here we describe the three data sources employed in this study: rain gauge observations, radar and lightning observations.

### **120 2.1 Rain gauge observations**

Rain gauges provide point observations of the accumulation. They are usually considered more accurate than radar, as point values, and are frequently used to correct the radar field

(Wilson and Brandes, 1979). The surface precipitation network (in total 472 stations) consists of standard weighting gauges and optical sensors mounted on road-weather masts. Since 125 2015, FMI manages 102 stations instrumented with the weighting gauge OTT Messtechnik Pluvio2. The Finnish Transport Agency (FTA) runs 370 road-weather stations with optical sensor measurements (Vaisala Present Weather Detectors models PWD22 and, to some extent, PWD11). The precipitation intensity is measured in different time intervals which are summed up to 1 hour precipitation accumulation information. Uncertainties and more detailed 130 information can be found in Gregow et al. (2013). If measurements consistently indicate poor data quality, either manually identified from station error-logs or by inspecting the data, those stations are blacklisted within the LAPS process and do not contribute to the precipitation accumulation analysis. Hereafter in this article, the weighting gauges and road-weather measurements are indistinctly called gauges and their placement in Finland is shown in Fig. 135 1a.

## 2.2 The radar data

As of summer 2014, FMI operated eight C-band Doppler radars (two more were added to the network late 2014 and autumn 2015). All but one in Vimpeli (western Finland; see Fig. 1b) are 140 dual-polarization radars. At the moment, the quantitative precipitation estimation based on dual-polarization is not used operationally in FMI, but the polarimetric properties contribute to the improved clutter cancellation (i.e. removal of non-meteorological echoes, especially sea clutter, birds and insects). In southern Finland, the distance between radars is 140–200 km, but in the north, the distance between Luosto and Utajärvi is 260 km. The location of the 145 radars and the coverage is shown in Fig. 1b. As Finland has no high mountains, the horizon of all the radars is near zero elevation with no major beam blockage, and, in general, the radar coverage is very good except in the most northern part of the country. The Finnish radar network does have a very high system utilization rate (e.g. no interruption). During year 2014 and 2015 the utilization rate was > 99%. Further details of the FMI radar network and 150 processing routines are described in Saltikoff et al. (2010).

The basic radar volume scan consists of thirteen PPI sweeps. The FMI operated LAPS version (hereafter FMI-LAPS) is using the six lowest elevations: 0.3 (alternative 0.1 or 0.5 depending on site location), 0.7, 1.5, 3.0, 5.0 and 9.0, which are scanned out to 250 km, and repeated

every 5 minutes. These radar volume scans are further used in LAPS routines for the rain-rate  
155 calculations but also, as proxy data to the LDA method (see Sect. 3.2).

## **2.3 The Lightning Location System (LLS)**

The Lightning Location System (LLS) of FMI is part of the Nordic Lightning Information System (NORDLIS). The system detects cloud-to-ground (CG) and intracloud (IC) strokes in  
160 the low-frequency (LF) domain. Finland is situated between 60–70°N and 19–32°E and thunderstorm season begins usually in May and lasts until September. During the period 1960–2007, on average, 140'000 ground flashes occurred during approximately 100 days per year (Tuomi and Mäkelä, 2008). The present modern lightning location system (LLS) was installed in summer 1997 (Tuomi and Mäkelä, 2007; Mäkelä et al., 2010; Mäkelä et al.,  
165 2016). The system consists of Vaisala Inc. sensors of various generations, and the sensor locations in 2015 and the efficient network coverage area can be seen in Fig. 2. Lightning location sensors detect the electromagnetic (EM) signals emitted by lightning return strokes, measure the signal azimuth and exact time (GPS). Sensors send these information to the central processing computer in real time which combines them, optimises the most probable  
170 strike point and outputs this information to the end user. More detailed information of LLS principles are described in Cummins et al. (1998). The lightning information used for the LAPS LDA-method is the location data (e.g. time, longitude and latitude) for each CG lightning stroke.

## **175 3 Methods**

The systems used to assimilate radar, gauge and lightning measurements are described in Sect. 3.1-3.2. The impact of different integration time periods on the Regression and Barnes (RandB)-method is shown in Sect. 3.3 and, finally, the verification methods in Sect. 3.4.

### **180 3.1 The Local Analysis and Prediction System (LAPS)**

The LAPS produces 3D analysis fields of several different weather parameters (Albers et al., 1996). LAPS uses statistical methods to perform a high-resolution spatial analysis where observational input, from several sources, are fitted to a coarser background model first-guess

field (e.g. ECMWF forecast model). Additionally, high resolution topographical data are used  
185 when creating the final analysis fields. The FMI-LAPS products are mainly used for now-  
casting purposes (i.e. what is currently happening and what will happen in the next few  
hours), which is of critical interest for end-users who demand near real-time products.

The FMI-LAPS use a pressure coordinate system including 44 vertical levels distributed with  
a higher resolution (e.g. 10 hPa) at lower altitudes and decreasing with height. The horizontal  
190 resolution is 3 kilometres and the temporal resolution is 1 hour. The domain used in this  
article covers the whole Finland and some parts of the neighbouring countries (Fig. 1b).  
LAPS highly relies on the existence of high-resolution observational network, in both space  
and time, and especially on remote sensing data. The FMI-LAPS is able to process several  
types of in-situ and remotely sensed observations (Koskinen et al., 2011), among which radar  
195 reflectivity, weighting gauges and road weather observations are used for calculating the  
precipitation accumulation. The Finnish radar volume scans are read into LAPS as NetCDF  
format files, thereafter the data is remapped to LAPS internal Cartesian grid and the mosaic  
process combines data of the different radar stations (Albers et al., 1996). The rain-rates are  
calculated from the lowest levels of the LAPS 3D radar mosaic data, via the standard Z-R  
200 formula (Marshall and Palmer, 1948), which is then used for precipitation accumulation  
calculations (see Sect. 3.2). Other information on observational usage, first-guess fields, the  
coordinate system etc. is described in Gregow et al. (2013).

In this study the lightning data are ingested into the FMI-LAPS. Modifications have been  
made to the software, in order to use it together with FMI operational radar input data and the  
205 new lightning algorithms.

### **3.2 The LAPS Lightning Data Assimilation (LDA) method**

A Lightning Data Assimilation (hereafter LDA) system has been developed by Vaisala and  
distributed as open and free software (Pessi and Albers, 2014). The LDA-method is  
210 constructed to build up statistical relationships between radar and lightning measurements.  
LDA counts the amount of CG lightning strokes and converts lightning rates into vertical  
radar reflectivity profiles, within each LAPS grid-cell. The radar reflectivity-lightning  
(hereafter Rad-Lig) relationship profiles may differ depending on the local geographical  
regime and climate. A set of default profiles are included within the LDA package, profiles

215 that were derived over the eastern United States with the use of radar data from NEXRAD network and lightning data from GLD360 network (Pessi, 2013 and Said et al., 2010). These profiles can be used as a first guess, if profiles for the local climate are not available.

For this study over Finland, climatological Rad-Lig reflectivity relationship profiles were estimated using NORDLIS-LLS lightning information and operational radar volume data 220 from Finland area, during summer 2014. A total of approximately 220'000 lightning strokes were used for this calibration. The FMI-LAPS LDA is using 5 minutes interval of lightning- and radar data, within a LAPS grid-box of resolution 3\*3 km. The collected strokes are divided into binned categories using an exponential division (i.e.  $2^n \dots 2^{n+1}$ ), following the same method used in Pessi (2013). This result in 6 different lightning categories (e.g. with 1, 2-3, 4- 225 7, 8-15, 16-31 and 32-63 strokes) for the NORDLIS-LLS dataset. For each of these 6 categories, the average radar reflectivity profile is calculated and gives the Average Rad-Lig profiles (Fig. 3a), which is the baseline method. We extend this method to also calculate the 3'rd Quartile (i.e. 75%-percentile) and a Variable Quartile Rad-Lig profiles. The Variable Quartile method uses a range between 50%-percentile (for the lower dBZ values) up to the 230 95%-percentile (for the highest dBZ values). The Rad-Lig profiles have been manually smoothed (i.e. removing peaks in the generated profiles), especially the highest profiles where there are less data available. There is a good correlation ( $R^2=0.95$ ) between the maximum reflectivity of profile and number of lightning strokes (Fig. 3b; results shown for the Average Rad-Lig profiles).

235 The Rad-Lig reflectivity profiles can be used either independently, or merged with the radar data, in the LAPS accumulation analysis. When merging the two sources, radar and lightning reflectivity values are compared at each grid-point, both horizontally and vertically. The data source giving the highest reflectivity value will be used in that LAPS grid-point. The logic behind this is that the radars are more likely to underestimate, than overestimate the 240 precipitation (due to attenuation, beam blocking or the nearest radar missing from network; e.g. Battan, 1973 and Germann, 1999), especially in thunderstorm situations. LAPS then uses the generated 3D volume reflectivity field in a similar manner as it would use the regular volume radar data, for example, to adjust hydrometeor fields and rainfall.

The reflectivity (Z) parameter measured by the radar, or estimated by LDA-method, is 245 converted to precipitation intensity (R; mm/h) within LAPS, using a pre-selected Z-R equation (Marshall and Palmer, 1948) as of the type:



$$Z=A \cdot R^b \quad (3)$$

Where A and b are empirical factors describing the shape and size distribution of the hydrometeors. In FMI-LAPS's implementation A=315 and b=1.5 for liquid precipitation, which is relevant in this study carried out during summer period. These static values introduce a gross simplification, since the drop size and particle shapes vary according to weather situation (drizzle/convective, wet snow/snow grain). Challenging situations include both convective showers, with heavy rainfall, and the opposite case of drizzle, with little precipitation (Uijlenhoet, 2008). Although convective events contribute only a fraction of the annual precipitation amount, they might be important during flooding events. On the other hand, the same static factors have been used for many years in FMI's other operational radar products, and looking at long-term averages, the radar accumulation data does match the gauge accumulation values within reasonable accuracy (Aaltonen et al., 2008). The intensity field (R; Eq. 3) is calculated at every 5 minutes and the 1 hour accumulation is thereafter obtained by summing up over the 5 minutes intervals.

The following FMI-LAPS precipitation accumulation products are calculated based on Radar- (hereafter Rad\_Accum), LDA- (hereafter LDA\_Accum) and the combined radar and LDA- (hereafter Rad\_LDA\_Accum) precipitation accumulation.

### 3.3 The FMI-LAPS Regression and Barnes (RandB) analysis method

The FMI-LAPS RandB-method corrects the precipitation accumulation estimates using radar and gauges datasets. The first step in this method is to make the radar-gauge correction using the Regression method. Data of hourly accumulation values are derived from the gauge-radar pairs within the LAPS grid (i.e. from same location and time), and from this a linear regression function can be established. The corrections from Regression method is applied to the whole radar accumulation field and thereafter used as input for the second step, the Barnes analysis. Within LAPS routines the Barnes interpolation converge the radar field towards gauge accumulation measurements at smaller areas (i.e. for gauge station surroundings). Several iterative correction steps are performed within the Barnes analysis, adjusting the final accumulation. The FMI-LAPS RandB-method is described in more details in Gregow et al. (2013).

In this article, the RandB-method is used to calculate the precipitation accumulation with the use of radar, lightning and the combination of radar-lightning. This gives the additional three FMI-LAPS accumulation products: Rad\_RandB, LDA\_RandB and Rad\_LDA\_RandB, 280 respectively.

### 3.3.1 RandB-method and the integration time period

The original FMI-LAPS RandB-method uses radar and gauge data from the recent hour. Using only the latest hour, the gauge observational dataset can suffer from too few 285 observations and thereby affect to the quality and robustness of the Regression- and Barnes calculations. As a further investigation in this article we use a selection of longer time periods (e.g. the previous 6, 12, 24 hours and 7 days of data) in order to build up a larger radar-gauge dataset. These datasets are thereafter used to make the correction within the RandB-method.

We have limited our studies to compare how the occurring synoptic weather situation, i.e. 290 frontal or convective situation (1 to 12 hours), and the medium time-range information (24 hours to 7 days) impact on the accumulation analysis. The longer integration time, the less information on the situational weather occurring at analysis time, i.e. the dataset is getting more smoothed and extremes might disappear.

Verification was done for the summer period 2015, using the input from radar and lightning, 295 and gives the following resulting accumulation products: Rad\_LDA\_RandB (i.e. dataset collected within the last 1 hour), Rad\_LDA\_RandB\_6hr, Rad\_LDA\_RandB\_12hr, Rad\_LDA\_RandB\_24hr and Rad\_LDA\_RandB\_7d, respectively.

### 3.4 Verification methods

300 The verification periods consists of one long period ranging from 1 April to 1 September, 2015 (i.e. to avoid the winter season and snow precipitation). This dataset includes many precipitating cases without lightning and therefore, the effective impact by lightning is diluted (e.g. no influence by the LDA-method). Therefore, a subset of 25 days with frequent lightning (e.g. > 100 CG strokes/day) were selected from summer 2015. Additionally, in order to 305 perform several autonomous experiments with the FMI-LAPS LDA system, a dataset consisting of four days with heavy rain and strong convection were used: 03, 23, 24 and 30 of

July 2014 (hereafter 4-days period). These were the 4 days with highest lightning intensity (e.g. > 100 strokes/day) in Finland, during year 2014.

The hourly accumulation results have been verified against surface gauge observations, both dependent and independent stations. The dependent station data are included into the FMI-LAPS analysis calculating the 1 hour precipitation accumulation, i.e. the analysis is depending on the station information used as input. There are 7 independent stations which are excluded from the LAPS analysis. In this study we apply a filter to the verification datasets, where hourly accumulation data less than 0.3 mm are discarded (due to the lowest threshold value of surface gauge measurements from FMI real-time database).

The validation of the different analysis methods are based on the logarithmic standard deviation (STDEV; Eq. 4), root-mean-square deviation (RMSE; Eq. 5), and Pearson's correlation coefficient (CORR; Eq. 6):

$$STDEV = \frac{1}{N-1} \sum_{i=1}^N \left( \log\left(\frac{Analysis_i}{Gauge_i}\right) - \overline{\log\left(\frac{Analysis}{Gauge}\right)} \right)^2 \quad (4)$$

$$RMSE = \sqrt{\frac{\sum_{i=1}^N ((Analysis_i - Gauge_i))^2}{N-1}} \quad (5)$$

$$CORR = \frac{\sum_i ((Gauge_i - \overline{Gauge})(Analysis_i - \overline{Analysis}))}{\sqrt{\sum_i (Gauge_i - \overline{Gauge})^2 \sum_i (Analysis_i - \overline{Analysis})^2}} \quad (6)$$

STDEV quantifies the amount of variation (i.e. spread) of a dataset. A low STDEV indicates that the data points tend to be close to the mean value of the dataset. Here we use the logarithm of the quotients, in order to get the datasets closer to be normally distributed. RMSE is a quadratic scoring rule, which measures the average magnitude of the error. Since the errors are squared before they are averaged, RMSE gives a relatively high weight to large errors. CORR gives a measure of the linear relationship (both strength and direction) between two quantities.

#### 4 Results and verification

Results using lightning data is presented in Sect. 4.1 and the impact from different integration time intervals in Sect. 4.2.

#### 4.1 FMI-LAPS LDA results

335 A slight improvement in the accumulation analysis, using lightning information, can be seen in the RMSE from the 25 days dataset of frequent thunderstorms (Table 1; compare Rad\_Accum and Rad\_LDA\_Accum). The effect is only visible when comparing with the dependent gauges, as no thunderstorms occurred at the seven independent stations. When the verification period is extended to the entire summer of 2015 (i.e. including days with no  
340 thunderstorms) the independent stations show some improvement (Table 2). The correlation (i.e. CORR) is higher for the Rad\_LDA\_Accum independent data (compared to Rad\_Accum), and even though the RMSE is higher, the STDEV has been improved. The overall impact for the dependent stations is neutral (Table 2 and Fig. 4; compare Rad\_Accum and Rad\_LDA\_Accum). For both the 25 days and whole summer period the Rad\_RandB and  
345 Rad\_LDA\_RandB give the best results, with similar scores.

Comparing the accumulation results from the 4-days period for radar alone (i.e. Rad\_Accum; black markers in Fig. 5) and lightning alone (i.e. LDA\_Accum; red markers in Fig. 5), it is clear that the use of LDA\_Accum is less accurate than Radar\_Accum results. Figure 5 also show that the Rad\_LDA\_Accum estimates (using the baseline method, with Average Rad-Lig  
350 profiles) are amplified over the whole range of precipitation values, compared to Rad\_Accum (Fig. 5; compare the blue with the black markers). For the high accumulation values ( $> 5$  mm/h) this is a positive effect, while in lower range ( $< 5$  mm/h) there is an overestimation of the results. Note that the plot uses log-scale at each axis.

Figure 6 show the results using different Rad-Lig profiles, i.e. Average-, 3'rd Quartile- and  
355 Variable Quartile profiles. The results are validated against Rad\_Accum. The precipitation accumulation estimates are improved at high accumulation values ( $> 5$  mm), using either 3'rd- or Variable Quartile profiles. Simultaneously, they both does add to the overestimate in low accumulation values ( $< 5$  mm). Note the use of log-scale, which enlarges the differences in the range of low values and reduces it in high ranges. The 3'rd Quartile profiles gives the  
360 largest overestimate, over the whole accumulation scale.

## 4.2 RandB-method and impact from different integration periods

The plotted results of different time sampling periods are seen in Fig. 7, with verification against the independent stations. The Rad\_LDA\_RandB (i.e. using observations from the latest 1 hour) does give the best result, when compared to Rad\_LDA\_Accum, Rad\_LDA\_RandB, Rad\_LDA\_RandB\_6hr, Rad\_LDA\_RandB\_12hr, Rad\_LDA\_RandB\_24hr and the Rad\_LDA\_RandB\_7d output. The statistical scores shown in Table 3 also imply the same result. Note that Rad\_LDA\_Accum (e.g. a method not using RandB, as an reference) is included when comparing the results of different integration periods.

370

## Discussions and conclusions

The aim of this article is to describe new methods on how to improve the hourly precipitation accumulation estimates, especially for heavy rainfall events ( $> 5$  mm) and, if possible, also the low-valued ranges ( $< 5$  mm) or at least leave them as unaffected as possible.

375 The strength of the LDA-method is that the radar and lightning information can be merged and complement each other. This is especially important in areas of poor, or even none, radar coverage, where the lightning information will improve the hourly precipitation accumulation analysis. The results in this article are limited to Finland but considering extending this area to include Scandinavia, the LDA-method will become even more useful. The long verification  
380 period (i.e. summer 2015) had fewer days of lightning compared to other years (on average) and therefore, the verification dataset was limited. Nevertheless, the summer period and the subset of 25 lightning intense days show neutral to positive impact in the results, using the LDA-method (Table 1-2 and Fig. 4). One reason we don't see larger impact by LDA-method could be that the Finnish radar network does have a very high quality and system utilization  
385 rate and therefore less impacted by the LDA-method.

The accumulation products generated from RandB-method are corrected using gauge information. This process is influencing the final accumulation results much more than the contribution from the LDA-method (seen in Fig. 4 results from dependent dataset, where a, c and b, d panels, respectively, are almost identical). The same result was seen for the  
390 independent dataset. Even though, we have proven that in case there would be no radar data (for example if the radar is malfunctioning), precipitation accumulation information would be available from lightning data (i.e. through the LDA-method) and add value to the final

product. This is visualized through the example in Fig. 8, where the radar- and Rad-Lig lowest reflectivity fields are plotted for one analysis time: 16 UTC, 30 July 2014, and for which, 395 accumulation would be generated from the LDA-method. In the RandB-method the Regression is used to correct for large-scale multiplicative biases between radar and gauge data. In this article we introduce lightning into the RandB-method, as an additional data source. However, lightning errors are likely to be different from those of radar and gauges and this could have an effect on the methodology used here. In future developments, after 400 collecting longer time series to quantify the nature of uncertainty of lightning-based precipitation estimates, we intend to improve the analysis in this direction.

New methods to calculate the Rad-Lig profiles reveal that the Variable Quartile method improve the estimates for the large accumulation (i.e.  $> 5$  mm), though with some overestimation in low accumulation (Fig. 6). The 3'rd Quartile approach gives the highest 405 impact to the whole accumulation field, which results in large overestimates for the low accumulation values (i.e. between 0-5 mm). The Average method smoothens out the small-scale variances, which is observed in heavy convection. Hence, the collected radar reflectivity profiles are less representative and, therefore, the calculated Rad-Lig profiles will have too low values in these cases. As a result, the Average method will give low impact to the final 410 precipitation accumulation estimates, compared to the use of 3'rd Quartile- and Variable Quartile method (Fig. 6). One should also mention that there is an overall uncertainty due to instrumental errors and the collocation between observations, within the LDA-method. This could potentially result in dislocation and bad quality of the received radar- and lightning measurements, which would affect to the calculated Rad-Lig profiles. For example in case of 415 radar attenuation, where strong rainfall weakens some part of the reflectivity field. Here the collected radar profiles will have too low reflectivity values and give underestimated Rad-Lig profiles, especially when using the Average method. In upcoming version of FMI-LAPS the calculated Rad-Lig profiles, using Variable Quartile method, will be implemented and verified for a long period. Also, for verification purposes, inclusion of areas with poor (or none) radar 420 coverage where gauges are available, will be studied.

For the near real-time accumulation product, data used from the recent hour of analysis time does give the best precipitation accumulation result (Table 3 and Fig. 7). We see correlation peeking at 1 hour integration period and decreasing already for the 6 hours period. Therefore, according to the result in this study, the use of long time integration periods for the RandB-

425 method (up till 7 days in this case) does not improve the hourly precipitation accumulation  
analysis. Berndt et al (2014) compared data resolutions from 10 minutes to 6 hours and  
reported a large improvement in the correlation (10 minutes to 1 hour the correlation  
increased 0.37 to 0.57). From 1 hour to 6 hours the corresponding increase was 0.57 to 0.62,  
respectively. In Norway, Abdella and Alfredsen (2010) have shown that the use of average  
430 monthly adjustment factors leads to less than optimal results. One could speculate that there is  
an intermediate choice of temporal resolution that would improve the results in this article.  
For example, there could be better results using periods of 2 to 5 hours. This has not been  
investigated in this article but will be considered in future studies.

### 435 **Acknowledgements**

We want to thank NOAA ESRL/GSD and Vaisala for their support of LAPS-LDA  
developments and Marco Gabella for his encouraging words.

## References

- Aaltonen, J., Hohti, H., Jylhä, K., Karvonen, T., Kilpeläinen, T., Koistinen, J., Kotro, J.,  
440 Kuitunen, T., Ollila, M., Parvio, A., Pulkkinen, S., Silander, J., Tiihonen, T., Tuomenvirta, H.,  
and Vajda, A.: Strong precipitation and urban floods (Rankkasateet ja taajamatulvat RATU),  
Finnish Environment Institute (Suomen ympäristökeskus), Helsinki, Finland, 80 pp., 2008.
- Abdella, Y. and Alfredsen, K.: Long-term evaluation of gauge-adjusted precipitation estimates  
from a radar in Norway, *Hydrol. Research*, Vol. 41 Issue 3/4, 171-192, 2010.
- 445 Albers, S. C., McGinley, J. A., Birkenheuer, D. L., and Smart, J. R.: The local analysis and  
prediction system (LAPS): Analyses of clouds, precipitation, and temperature, *Weather  
Forecast.*, 11, 273-287, 1996.
- Battan, L. J.: *Radar Observation of the Atmosphere*, University of Chicago Press, Chicago,  
1973.
- 450 Berndt, C., Rabiei, E. and Haberlandt, U.: Geostatistical merging of rain gauge and radar data  
for high temporal resolutions and various station density scenarios, *J. Hydrology*, 508, 88-101,  
2014.
- Cummins, K. L., Murphy, M. J., Bardo, E. A., Hiscox, W. L., Pyle, R. B., and Pifer, A. E.: A  
combined TOA/MDF technology upgrade of the U.S. National Lightning Detection Network,  
455 *J. Geophys. Res.*, 103, 9035–9044, doi: <http://dx.doi.org/10.1029/98JD00153>, 1998.
- Einfalt, T., Jessen, M., and Mehlig, B.: Comparison of radar and raingauge measurements  
during heavy rainfall, *Water Sci. Technol.*, 51, 2, 195–201, 2005.
- Germann, U.: Radome attenuation – a serious limiting factor for quantitative radar  
measurements?, *Meteorol. Z.*, 8, 85–90, 1999.
- 460 Gires, A., Tchiguirinskaia, I., Schertzer, D., Schellart, A., Berne, A., and Lovejoy, S.:  
Influence of small scale rainfall variability on standard comparison tools between radar and  
rain gauge data, *Atmospheric Research*, 138, 125–138,  
<http://dx.doi.org/10.1016/j.atmosres.2013.11.008>, 2014.
- Goudenhoofdt, E. and Delobbe, L.: Evaluation of radar-gauge merging methods for  
465 quantitative precipitation estimates, *Hydrol. Earth Syst. Sci.*, 13, 195-203, 2009.
- Gregow, E., Saltikoff, E., Albers, S., and Hohti, H.: Precipitation accumulation analysis –  
assimilation of radar-gauge measurements and validation of different methods, *Hydrol. Earth  
Syst. Sci.*, 17, 4109–4120, doi:10.5194/hess-17-4109-2013, 2013.



IPCC-AR5: Climate change 2013, available on-line: <http://www.ipcc.ch/report/ar5/wg1/>,  
470 2013.

Jaffrain, J. and Berne, A.: Influence of the subgrid variability of the raindrop size distribution on radar rainfall estimators, *J. Appl. Meteorol. Clim.*, 51, 780–785, doi:10.1175/JAMC-D-11-0185.1, 2012.

475 Jewell, S. A. and Gaussiat, N.: An assessment of kriging-based rain-gauge-radar merging techniques, *Q. J. Roy. Meteor. Soc.*, 2015.

Koistinen, J. and Michelson, D. B.: BALTEX weather radar-based precipitation products and their accuracies, *Boreal Environ. Res.*, 7, 253–263, 2002.

Koskinen, J. T., and Coauthors.: The Helsinki Testbed: A mesoscale measurement, research,  
480 and service platform, *Bull. Amer. Meteor. Soc.*, 92, 325–342, doi:10.1175/2010BAMS2878.1, 2011.

Marshall, J. S. and Palmer, W. M.: The Distribution of raindrops with size, *J. Meteorol.*, 5, 165-166, 1948.

Morales, C. A. and Anagnostou, E. N.: Extending the capabilities of high-frequency rainfall  
485 estimation from geostationary-based satellite infrared via a network of long-range lightning observations, *J. Hydrometeorol.*, 4, 141–159, 2003.

Mäkelä, A., Rossi, P. and Schultz, D. M.: The daily cloud-to-ground lightning flash density in the contiguous United States and Finland, *Mon. Wea. Rev.*, 139, 1323–1337, DOI:10.1175/2010MWR3517.1, 2011.

490 Mäkelä, A., Tuomi, T. J., and Haapalainen, J.: A decade of high-latitude lightning location: Effects of the evolving location network in Finland, *J. Geophys. Res.*, 115, D21124, doi:<http://dx.doi.org/10.1029/2009JD012183> , 2010.

Mäkelä, A., Mäkelä, J., Haapalainen, J., and Porjo, N.: The verification of lightning location accuracy in Finland deduced from lightning strikes to trees, *Atmospheric Research*, 172, 1-7,  
495 2016.

Papadopoulos, A., Chronis, T. G., and Anagnostou, E. N.: Improving convective precipitation forecasting through assimilation of regional lightning measurements in a mesoscale model, *Mon. Wea. Rev.*, 133, 1961-1977, 2005.

Pessi, A.: Characteristics of Lightning and Radar Reflectivity in Continental and Oceanic  
500 Thunderstorms, 93th Annual American Meteorological Society Meeting. Austin, Texas,  
United States, 6-10 January, available online at:  
<https://ams.confex.com/ams/93Annual/webprogram/Paper215562.html>, 2013.

Pessi, A. and Albers, S.: A Lightning Data Assimilation Method for the Local Analysis and  
Prediction System (LAPS): Impact on Modeling Extreme Events, 94th Annual American  
505 Meteorological Society Meeting, Atlanta, Georgia, United States, 1-6 February, available  
online at: <https://ams.confex.com/ams/94Annual/webprogram/Paper238715.html>, 2014.

Said, R. K., Inan, U. S. and Cummins, K. L.: Long-range lightning geolocation using a VLF  
radio atmospheric waveform bank, *J. Geophys. Res.*, 115, D23108,  
doi:10.1029/2010JD013863, 2010.

510 Saltikoff, E., Huuskonen, A., Hohti, H., Koistinen, J., and Järvinen, H.: Quality assurance in  
the FMI Doppler Weather radar network, *Boreal Environ. Res.*, 15, 579-594, 2010.

Schiemann, R., Erdin, R., Willi, M., Frei, C., Berenguer, M., and Sempere-Torres, D.:  
Geostatistical radar-raingauge combination with nonparametric correlograms: methodological  
considerations and application in Switzerland. *Hydrol. Earth Syst. Sci.*, 15, 1515–1536,  
515 doi:10.5194/hess-15-1515-2011, 2011.

Sideris, I. V., Gabella, M., Erdin, R., and Germann, U.: Real-time radar-raingauge merging  
using spatiotemporal co-kriging with external drift in the alpine terrain of Switzerland, *Q. J.  
Roy. Meteor. Soc.*, 140 (680), 1097-1111, 2014.

Tuomi, T. J. and Mäkelä, A.: Lightning observations in Finland, Reports, Finnish  
520 Meteorological Institute, 2007:5, 49 pp, 2007.

Tuomi, T. J. and Mäkelä, A.: Thunderstorm climate of Finland 1998–2007, *Geophysica*, 44,  
29–42, 2008.

Uijlenhoet, R.: Raindrop size distributions and radar reflectivity–rain rate relationships for  
radar hydrology, *Hydrol. Earth Syst. Sc.*, 5(4), 615–627, 2008.

525 Wang, L.P., Ochoa-Rodríguez, S., Onof, C. and Willems, P.: Singularity-sensitive gauge-based  
radar rainfall adjustment methods for urban hydrological applications, *Hydrol. Earth Syst. Sc.*,  
19 (9), 4001-4021, 2015.

Wilson, J. W. and Brandes, E. A.: Radar Measurement of Rainfall - A Summary, *Bull. Amer.  
Meteor. Soc.*, 60 , 1048–1058, 1979.

530 Table 1. Precipitation accumulation results, using radar (Rad\_Accum) and radar merged with lightning dat (Rad\_LDA\_Accum), together with and without RandB-method (Rad\_RandB and Rad\_LDA\_RandB, respectively). Verification both for the dependent and independent stations dataset, for a period of 25 intensive lightning days (e.g. > 100 CG strokes/day) during summer 2015.

|                    | Rad_Accum | Rad_LDA_Accum | Rad_RandB | Rad_LDA_RandB |
|--------------------|-----------|---------------|-----------|---------------|
| <u>Dependent</u>   |           |               |           |               |
| Nr of observations | 3206      | 3332          | 3822      | 3823          |
| STDEV (log(R/G))   | 0.27      | 0.27          | 0.12      | 0.12          |
| RMSE               | 1.66      | 1.64          | 0.76      | 0.76          |
| CORR               | 0.67      | 0.67          | 0.93      | 0.93          |
| <u>Independent</u> |           |               |           |               |
| Nr of observations | 0         | 0             | 0         | 0             |

535

Table 2. Precipitation accumulation results, using radar (Rad\_Accum) and radar merged with lightning dat (Rad\_LDA\_Accum), together with and without RandB-method (Rad\_RandB and Rad\_LDA\_RandB, respectively). Verification was performed against both the dependent and independent stations datasets, for whole summer period 2015.

|                    | Rad_Accum | Rad_LDA_Accum | Rad_RandB | Rad_LDA_RandB |
|--------------------|-----------|---------------|-----------|---------------|
| <b>Dependent</b>   |           |               |           |               |
| Nr of observations | 14414     | 14420         | 17724     | 17725         |
| STDEV (log(R/G))   | 0.25      | 0.25          | 0.13      | 0.13          |
| RMSE               | 1.25      | 1.24          | 0.54      | 0.54          |
| CORR               | 0.64      | 0.65          | 0.93      | 0.93          |
| <b>Independent</b> |           |               |           |               |
| Nr of observations | 1694      | 1102          | 1402      | 1402          |
| STDEV (log(R/G))   | 0.39      | 0.25          | 0.15      | 0.15          |
| RMSE               | 1.28      | 1.44          | 0.69      | 0.71          |
| CORR               | 0.71      | 0.72          | 0.92      | 0.92          |

540

Table 3. Impact of the integration time length on RandB-method, for the dependent and independent stations datasets, during summer 2015. Note that Rad\_LDA\_Accum (e.g. a method not using RandB, as an reference) is included when comparing the results of different integration periods.

|                    | Rad_LDA<br>_Accum | Rad_LDA<br>_RandB<br>_1hr | Rad_LDA<br>_RandB<br>_6hr | Rad_LDA<br>_RandB<br>_12hr | Rad_LDA<br>_RandB<br>_24hr | Rad_LDA<br>_RandB<br>_7d |
|--------------------|-------------------|---------------------------|---------------------------|----------------------------|----------------------------|--------------------------|
| <b>Dependent</b>   |                   |                           |                           |                            |                            |                          |
| Nr of observations | 13200             | 16311                     | 10956                     | 10917                      | 10915                      | 11033                    |
| STDEV (log(R/G))   | 0.25              | 0.13                      | 0.13                      | 0.13                       | 0.14                       | 0.14                     |
| RMSE               | 1.20              | 0.52                      | 0.67                      | 0.71                       | 0.72                       | 0.72                     |
| CORR               | 0.64              | 0.93                      | 0.91                      | 0.90                       | 0.89                       | 0.89                     |
| <b>Independent</b> |                   |                           |                           |                            |                            |                          |
| Nr of observations | 1177              | 1492                      | 1028                      | 1013                       | 1005                       | 1014                     |
| STDEV (log(R/G))   | 0.25              | 0.15                      | 0.22                      | 0.22                       | 0.22                       | 0.22                     |
| RMSE               | 1.38              | 0.68                      | 1.16                      | 1.23                       | 1.24                       | 1.24                     |
| CORR               | 0.39              | 0.92                      | 0.79                      | 0.77                       | 0.77                       | 0.77                     |

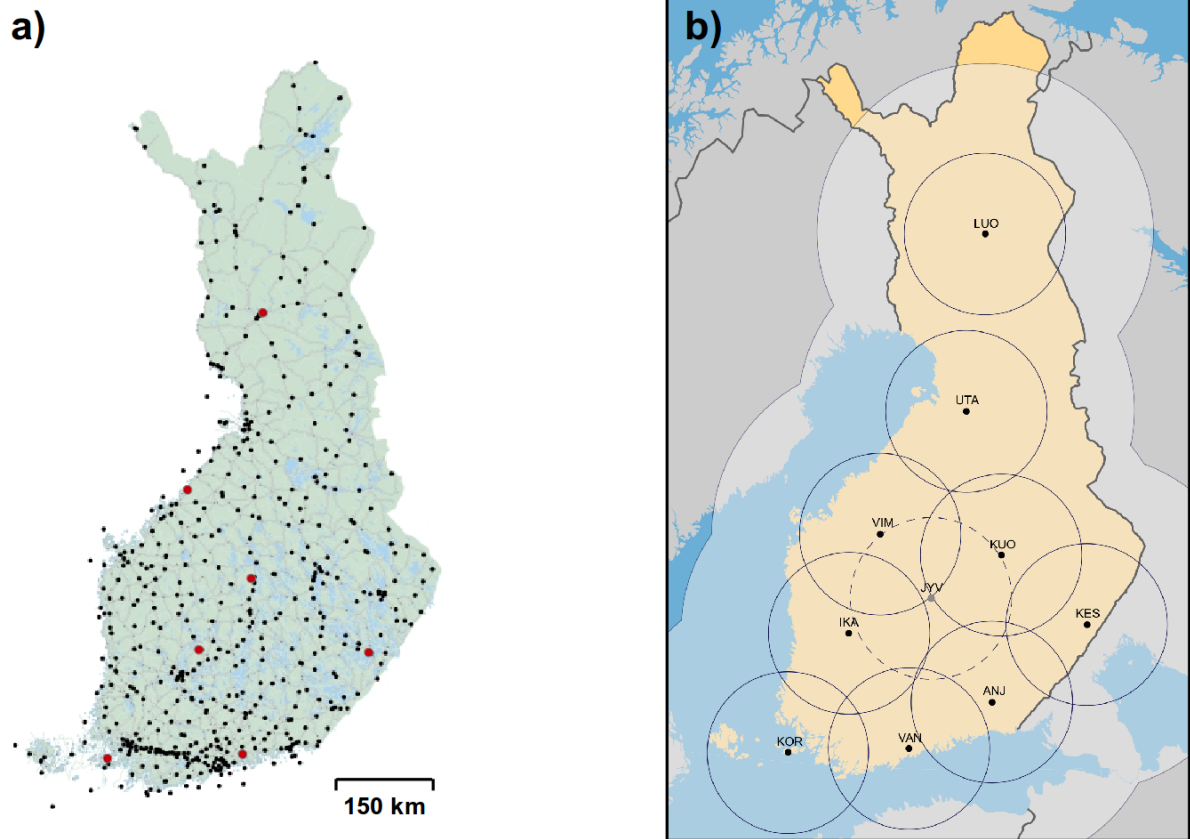

Figure 1. In (a) the Finnish surface gauge stations are shown (as dots on the map), these are used to measure the hourly precipitation accumulation. The red dots indicate the position of 550 the 7 independent stations used for the verification. In (b) the outer rectangular frame of the map depicts the LAPS analysis domain. The black dots represent the 10 Finnish radar stations and the outer, black curved lines display their coverage. The thin circles surrounding each radar represent the areas where measurements are performed below 2 km height.

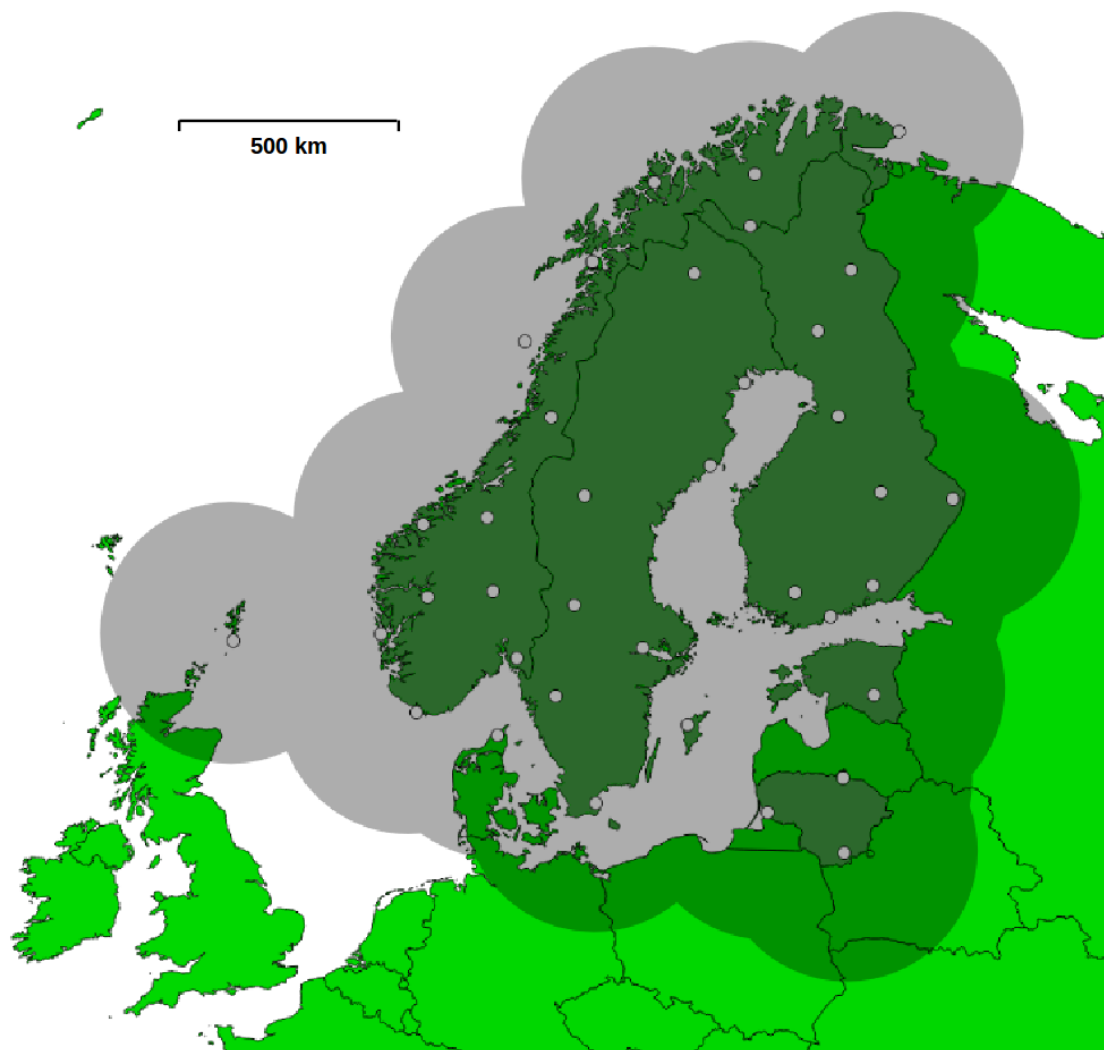

Figure 2. The LLS sensor locations (white dots) and coverage (grey circular areas), as of year 555 2015.

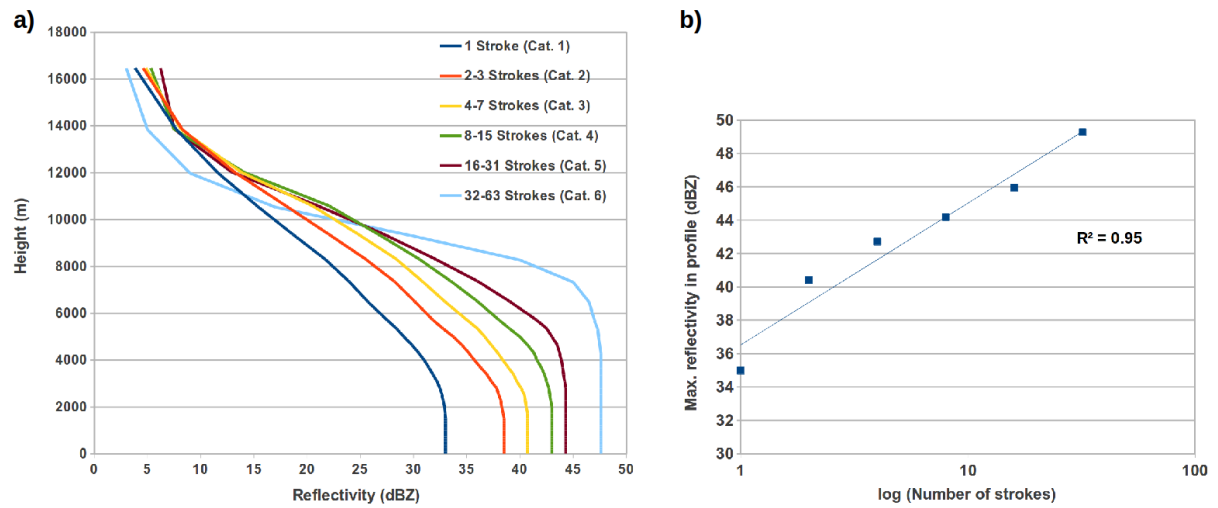

Figure 3. In a) Rad-Lig relationship profiles (smoothed) from Finland NORDLIS-LLS, calculated using dataset from summer 2014. Profiles are divided into binned categories of strokes, with temporal resolution of 5 minutes and spatial resolution of 3 km. In b) profile's 560 max reflectivity values versus lightning rate (logarithmic-scale of bins).



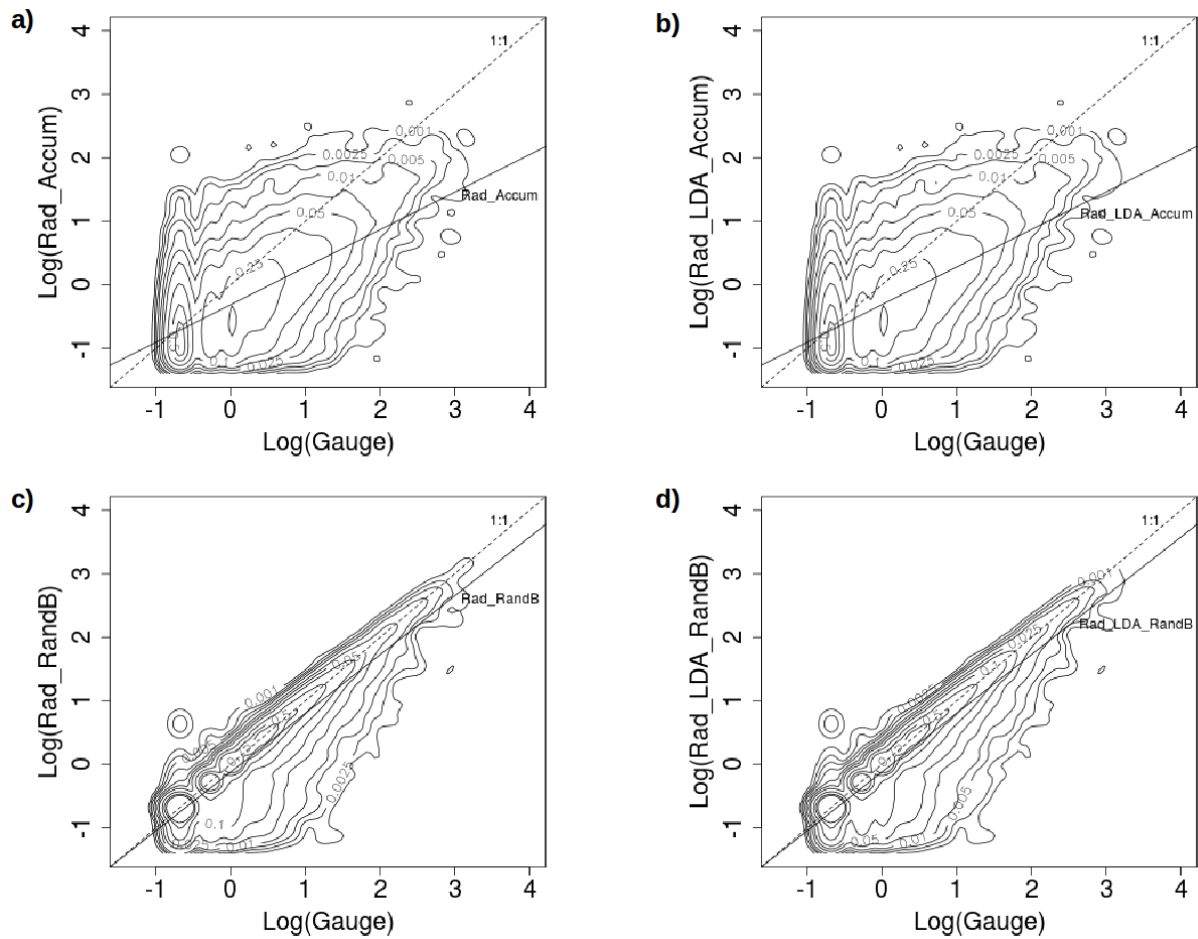

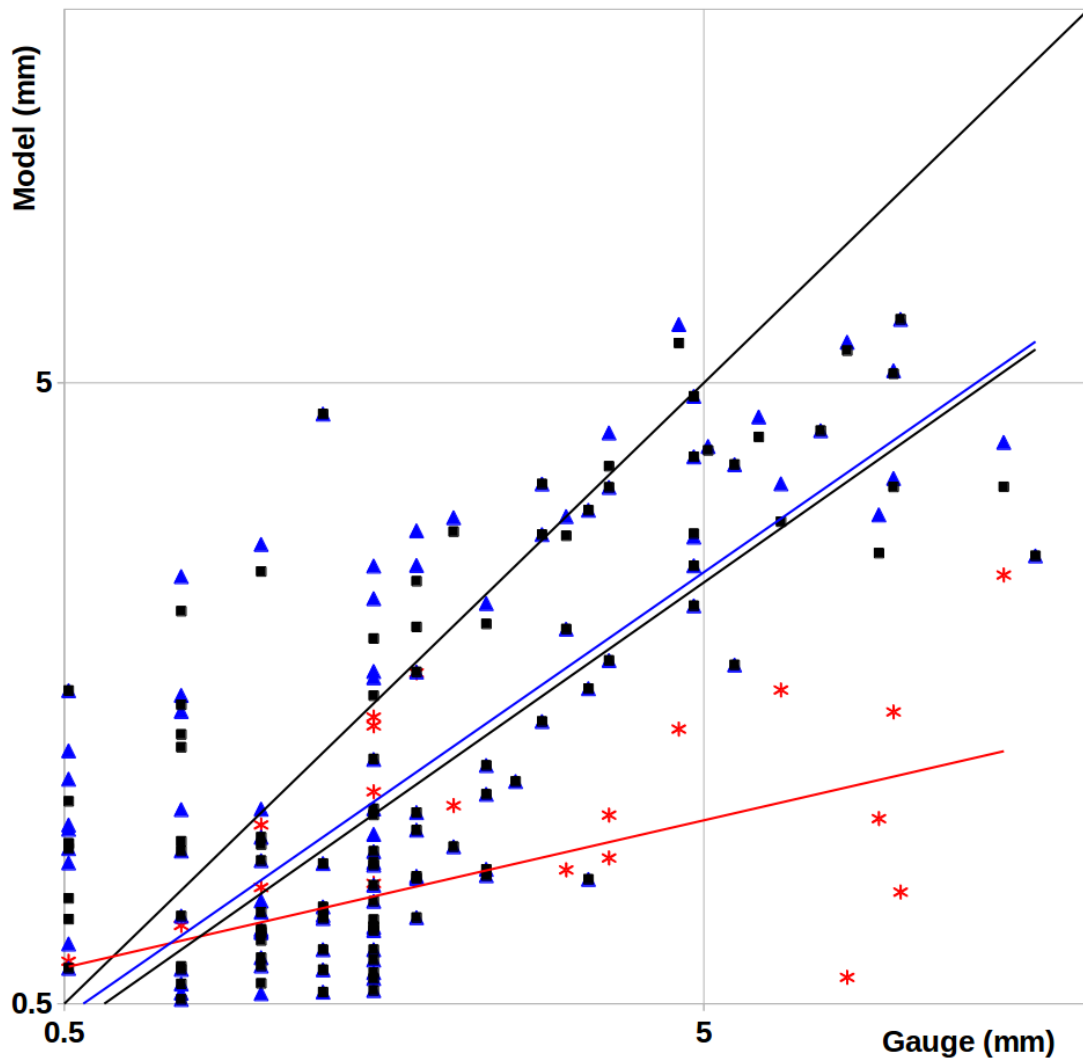

Figure 5. Verification of hourly accumulation values for LDA\_Accum (red stars and line) and the merged Rad\_LDA\_Accum (blue triangles and line), compared to Rad\_Accum (black boxes and line) for the 4-days period (July, 2014). The axes are log-scaled. Black solid line is 570 the best fit line (1:1 fit).

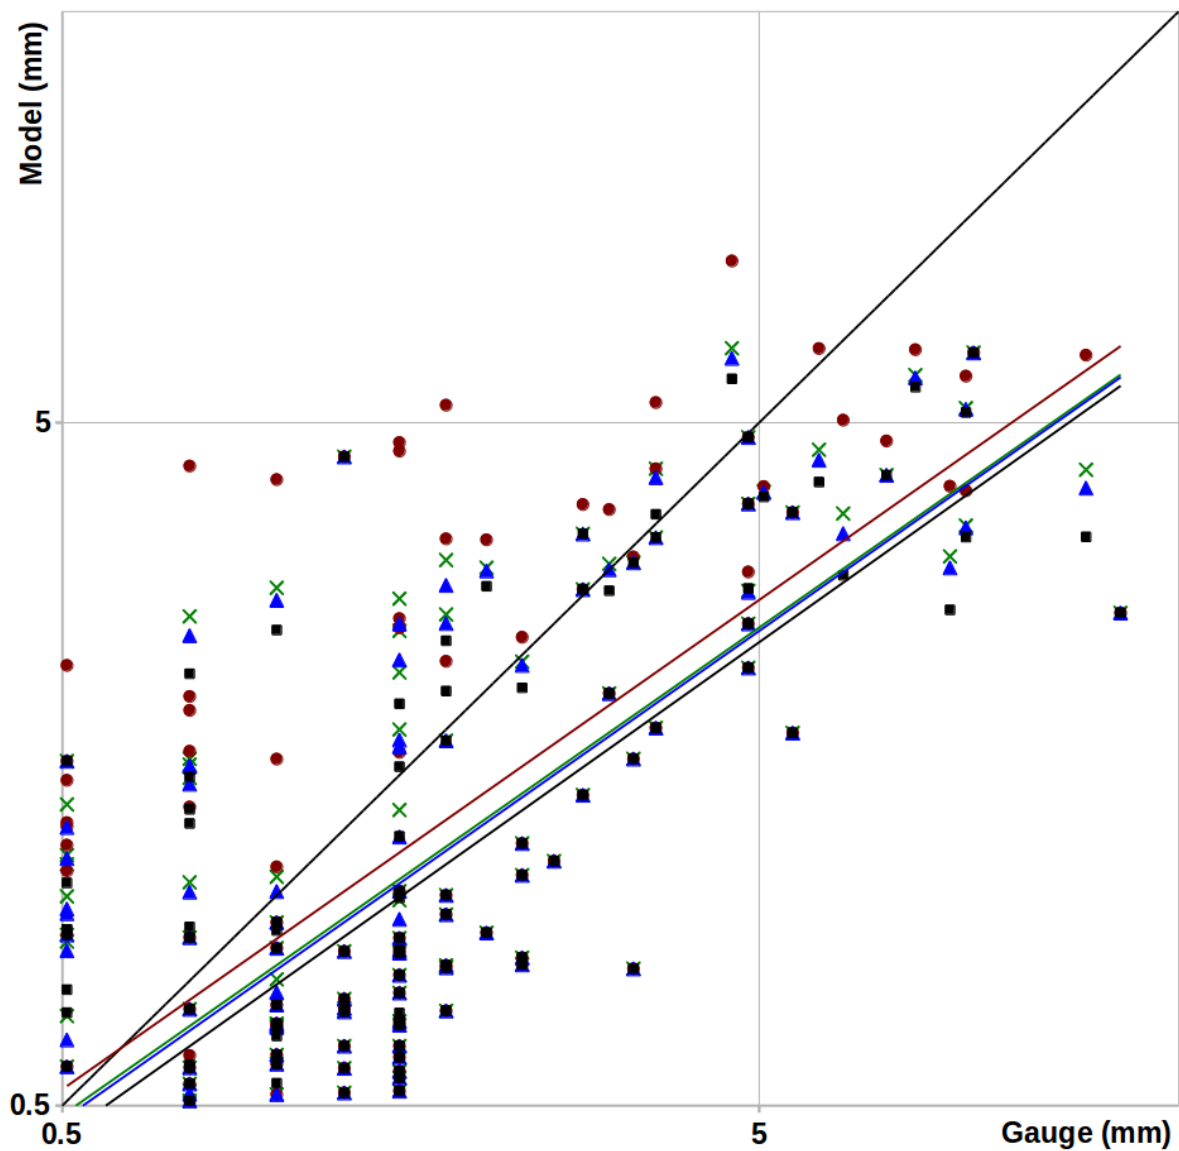

Figure 6. Comparison between Rad\_Accum (black squares) and LDA\_Accum (triangle-, cross- and circular markers), using 3 different methods to calculate the relationship profiles: Average- (blue triangles), 3'rd Quartile- (red circles) and the Variable Quartile (green crosses) 575 accumulation estimates. The corresponding regression lines are represented with same color as the markers, for each method. Data are for the 4-days period in summer 2014 and as hourly accumulation values. The best fit curve (i.e. the 1:1 fit) is shown as black solid line.



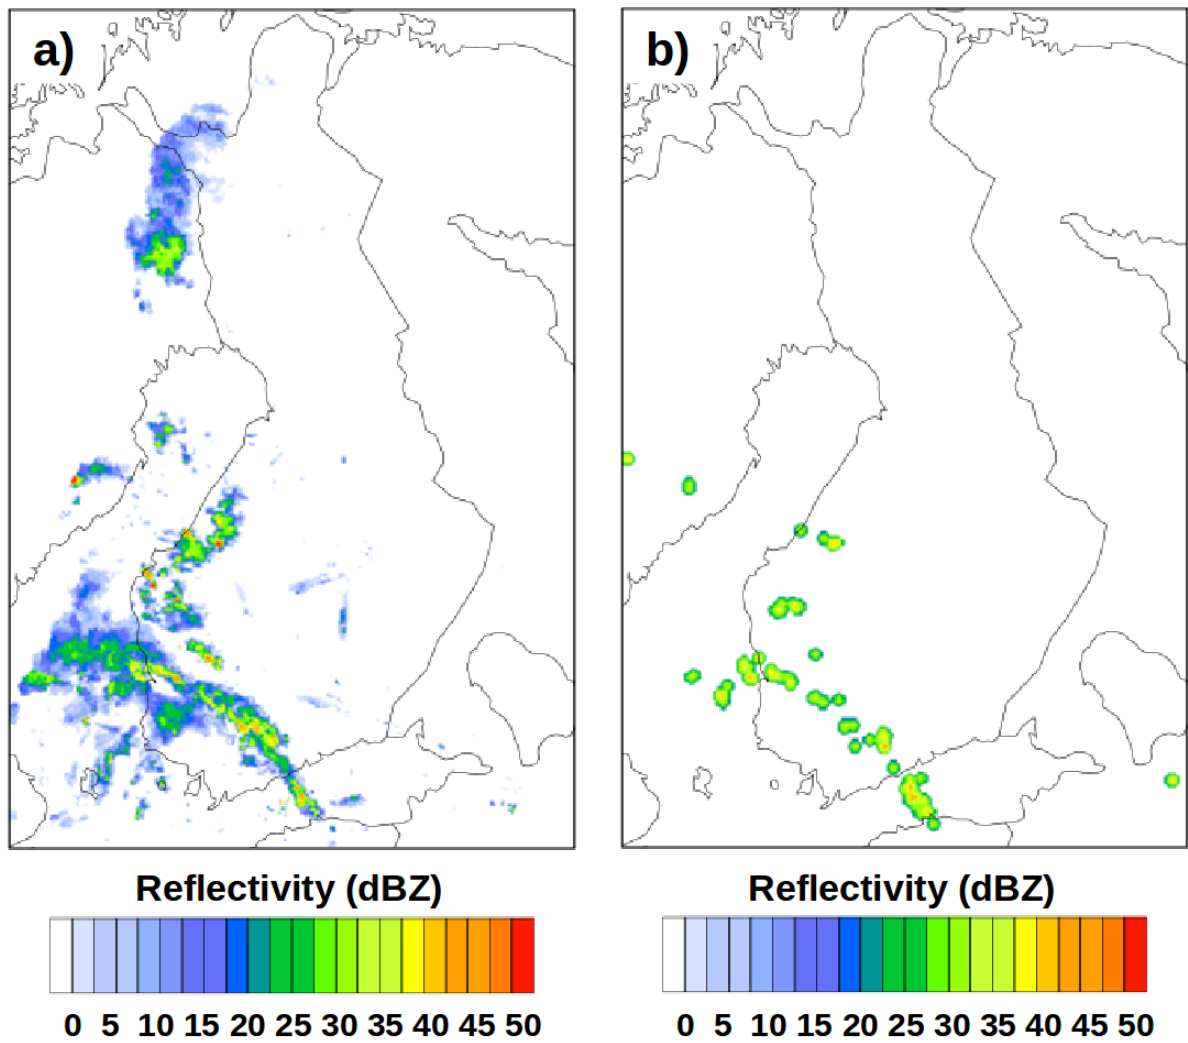

Figure 8. Example of lowest level reflectivity field from a) radar alone and b) converted 585 lightning locator analysis alone (via LDA system) for 30 July 2014 at 16 UTC. Reflectivity color scale is shown below plots
